# Supplementary material for: Validating the recording of exacerbations of asthma in electronic health records: a systematic review protocol
Source: HighWire-hosted journal article supplement (doi:10.1136/bmjopen-2024-088849), 2024-11-01
Supplement: bmjopen-2024-088849supp002_data_supplement.pdf [file bmjopen-2024-088849supp002_data_supplement.pdf]

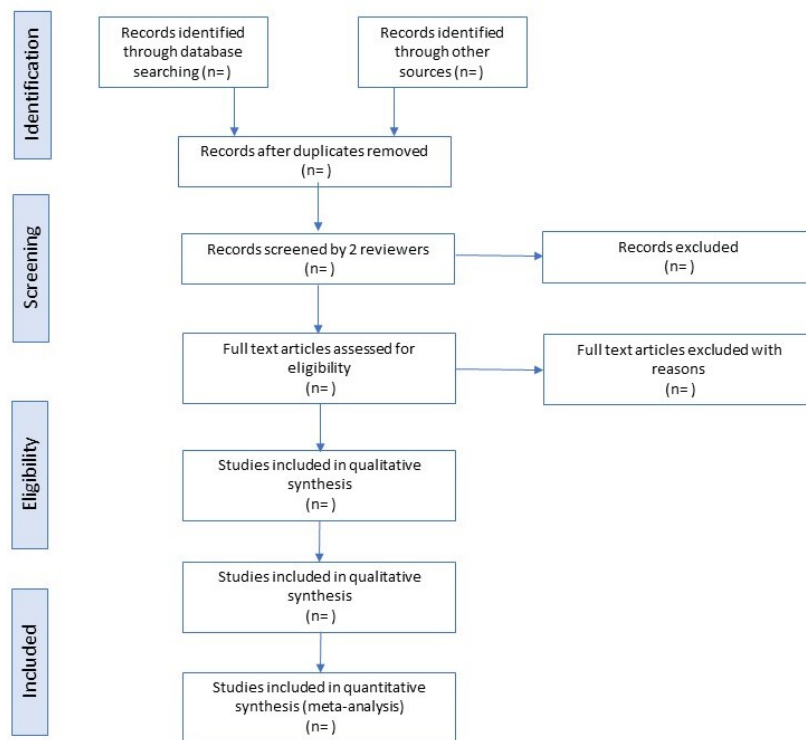

Figure 1. Study screening process: Preferred Reporting Items for Systematic Reviews and Meta-Analyses flow diagram from Moher *et al.*
